# Supplementary material
Source: PubMed Central journal article supplement (PMC10234106)
Supplement: qpad039_suppl_supplementary_material.pdf [file qpad039_suppl_supplementary_material.pdf]

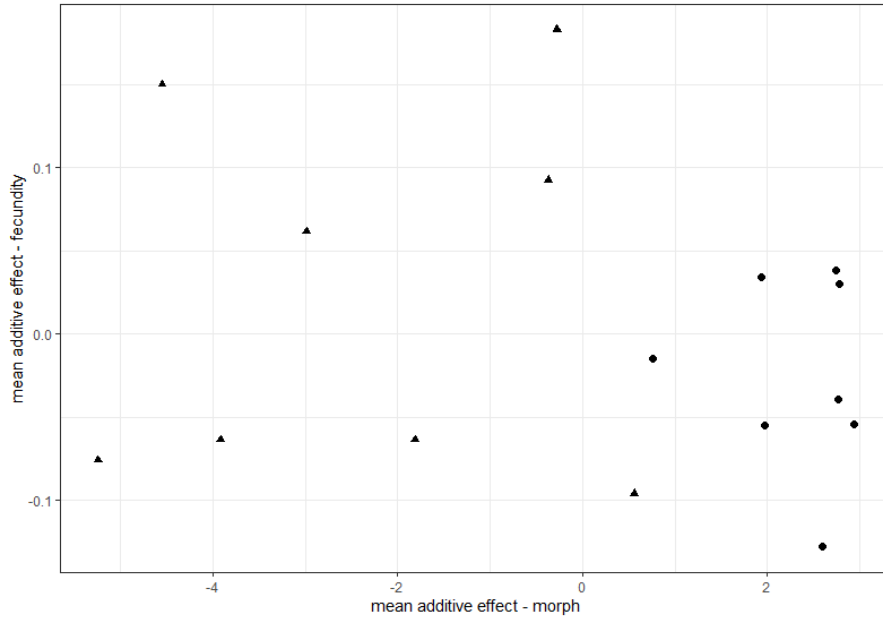

**Supplementary Figure 2.** No significant correlation between mean additive effect (mean HPD) of morph and fecundity. Lines founded by fighter and scambler males are demoted by circles and triangles, respectively.

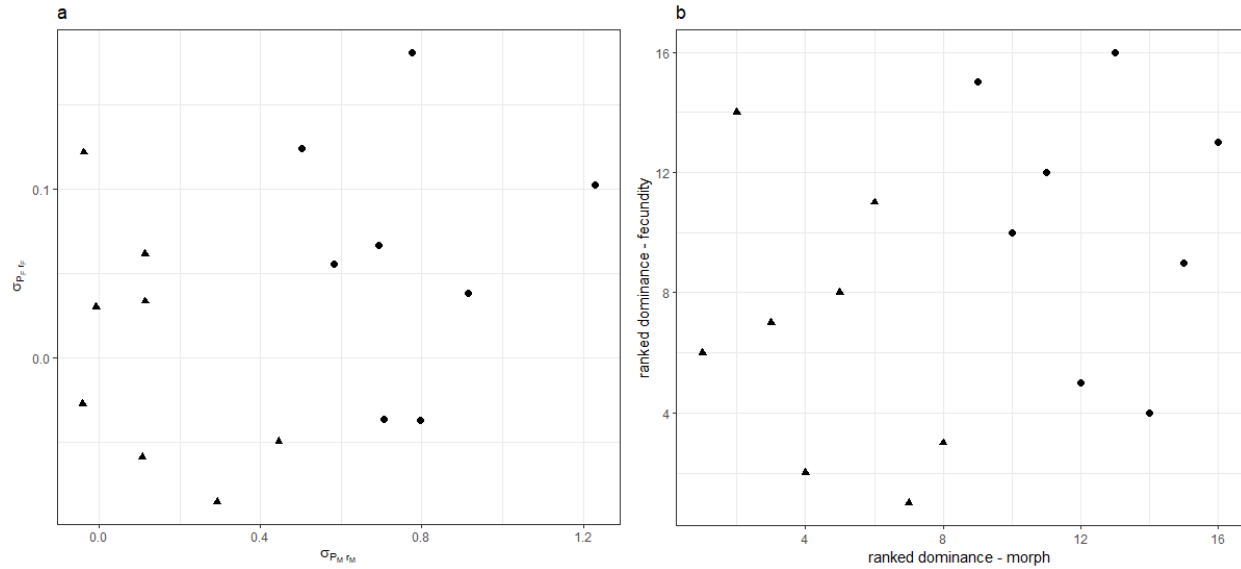

**Supplementary Figure 3.** No significant correlation between estimates of relative amount of recessive allelic variation for male morph ( $\sigma_{PM,IM}$ ) and fecundity ( $\sigma_{PF,IF}$ ), whether taking a) estimated values or b) rank of estimated values. Lines founded by fighter and scambler males are demoted by circles and triangles, respectively.
